# Supplementary material
Source: PubMed Central journal article supplement (PMC3868635)

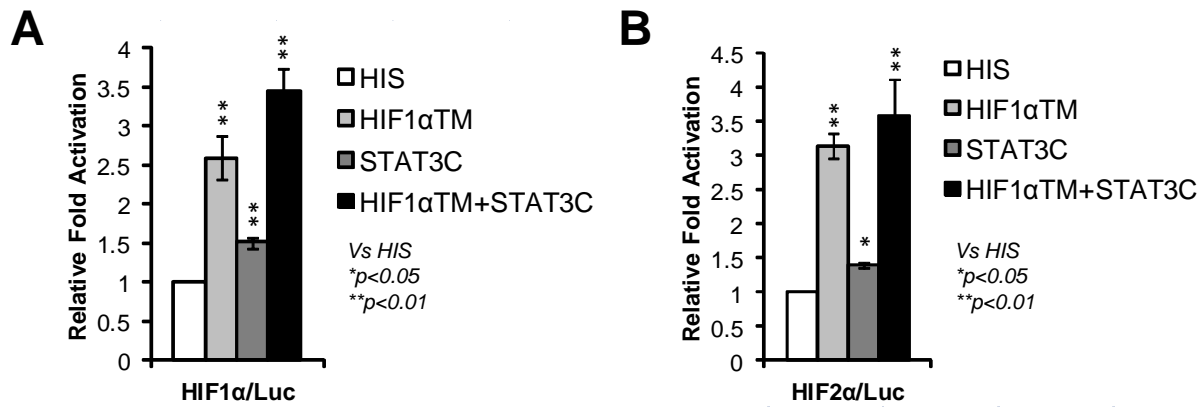

Figure S1

Supplement: NIHMS508570-supplement-supplement_1.pdf [file NIHMS508570-supplement-supplement_1.pdf]
